# Supplementary material
Source: ML conference proceedings conference paper supplement (https://openaccess.thecvf.com/content/cvpr_2015/html/Yang_Dual_Domain_Filters_2015_CVPR_paper.html)
Supplement: Supplementary file 1 [file Yang_Dual_Domain_Filters_2015_CVPR_supplemental.pdf]

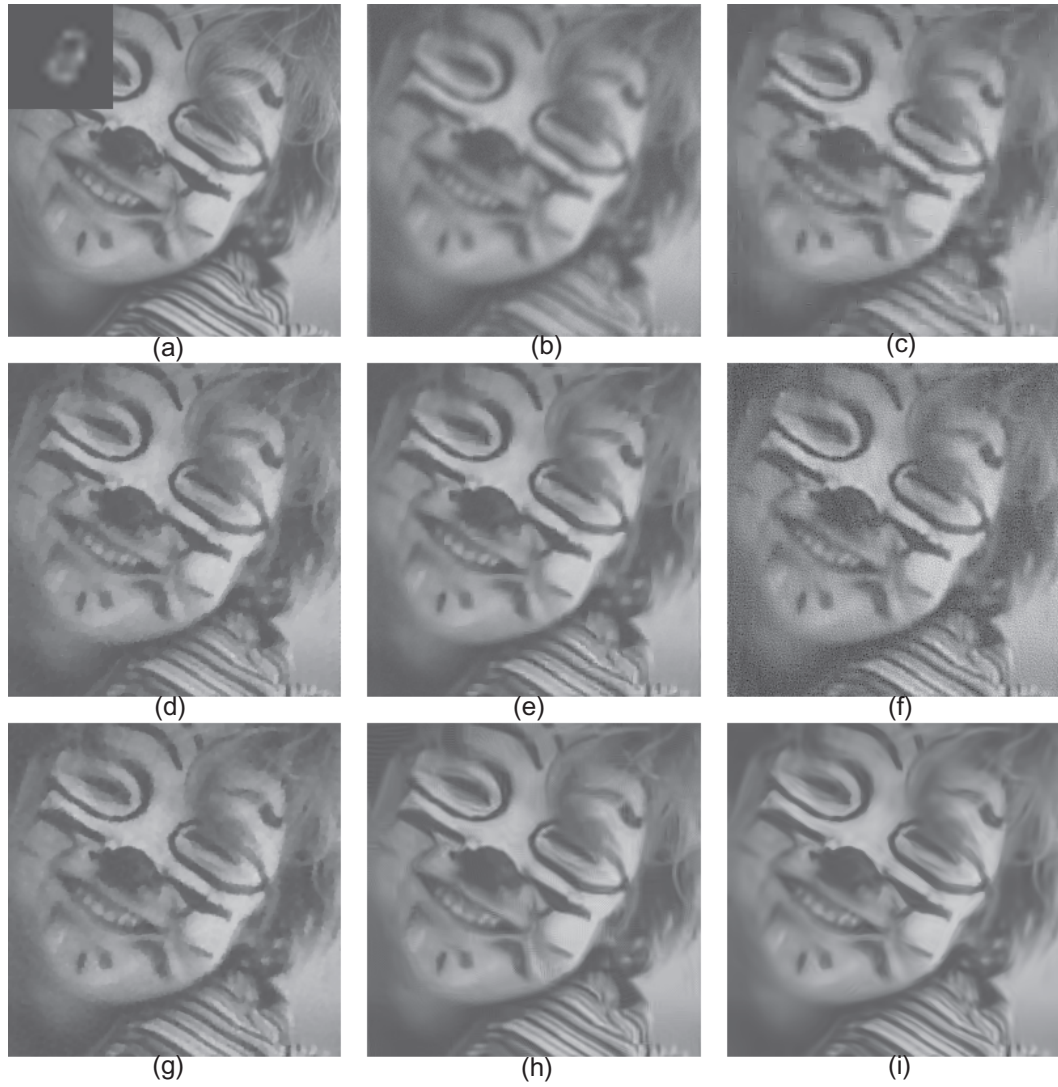

Figure 1:

- (a) clean image and PSF;
- (b) blurred image, BSNR = 20 ;
- (c) ForWaRD result, ISNR = 3.62;
- (d) FTVd result, ISNR = 6.72;
- (e) L0-ABS result, ISNR = 6.99;
- (f) SURE-LET result, ISNR = -0.46;
- (g) PIEIAS result, ISNR = 8.76;
- (h) BM3DDEB result, ISNR = 8.96;
- (i) Our result, ISNR = 9.53.

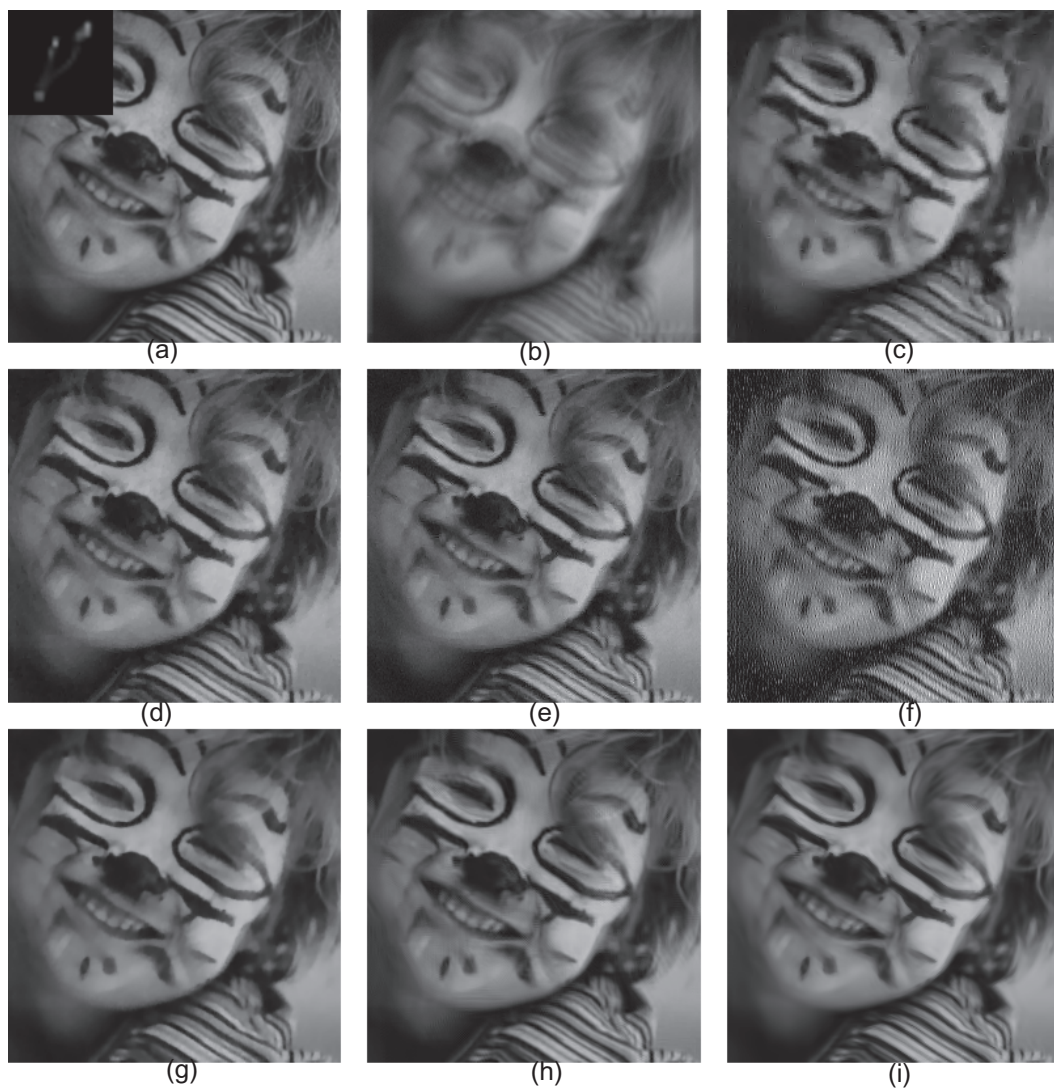

Figure 2:

- (a) clean image and PSF;
- (b) blurred image, BSNR = 30 ;
- (c) ForWaRD result, ISNR = 11.45;
- (d) FTVd result, ISNR = 16.35;
- (e) L0-ABS result, ISNR = 14.07;
- (f) SURE-LET result, ISNR = 0.7;
- (g) PIEIAS result, ISNR = 16.46;
- (h) BM3DDEB result, ISNR = 17.65;
- (i) Our result, ISNR = 18.31.

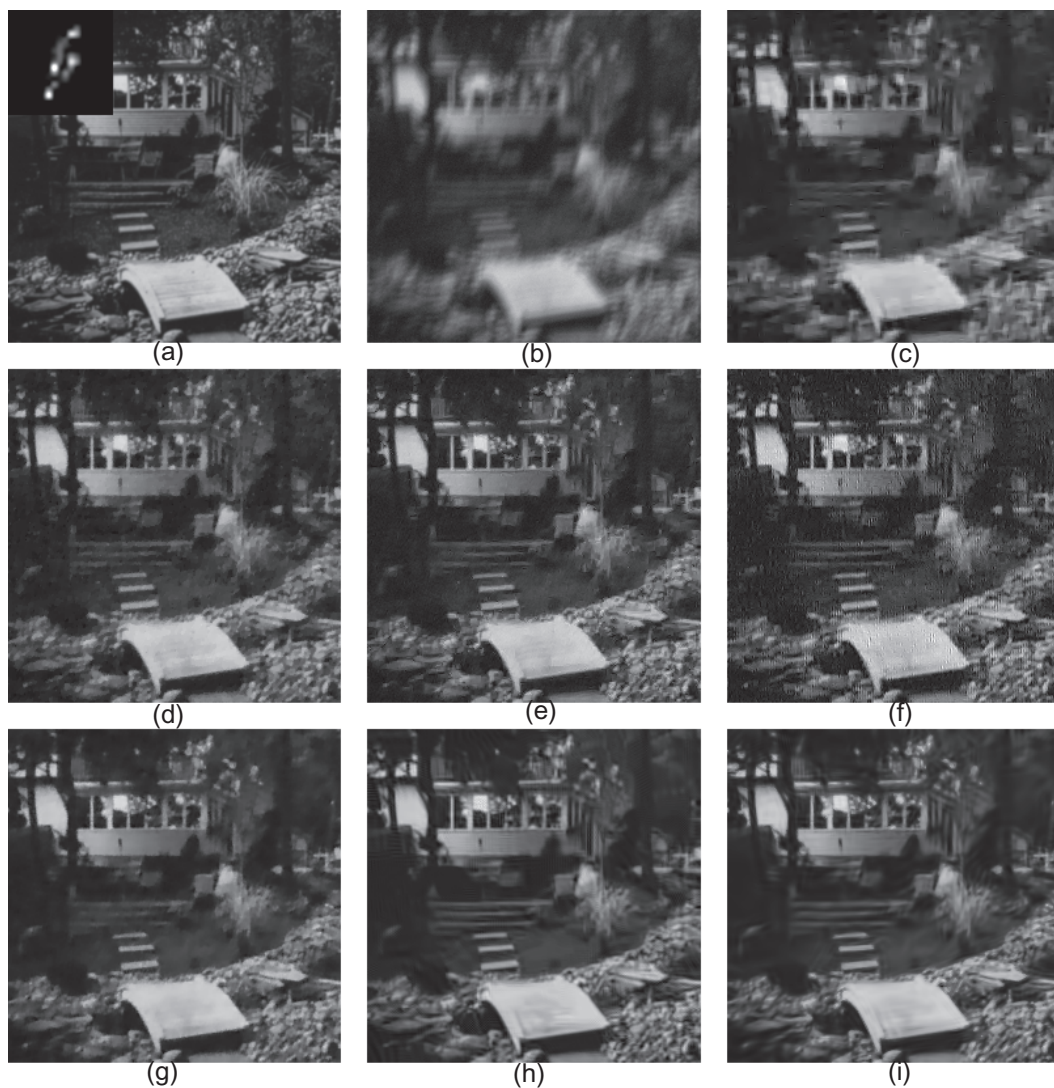

Figure 3:

- (a) clean image and PSF;
- (b) blurred image,  $\text{BSNR} = 25$  ;
- (c) ForWaRD result,  $\text{ISNR} = 4.53$ ;
- (d) FTVd result,  $\text{ISNR} = 8.08$ ;
- (e) L0-ABS result,  $\text{ISNR} = 7.47$ ;
- (f) SURE-LET result,  $\text{ISNR} = 2.95$ ;
- (g) PIEIAS result,  $\text{ISNR} = 8.64$ ;
- (h) BM3DDEB result,  $\text{ISNR} = 8.71$ ;
- (i) Our result,  $\text{ISNR} = 9.52$ .



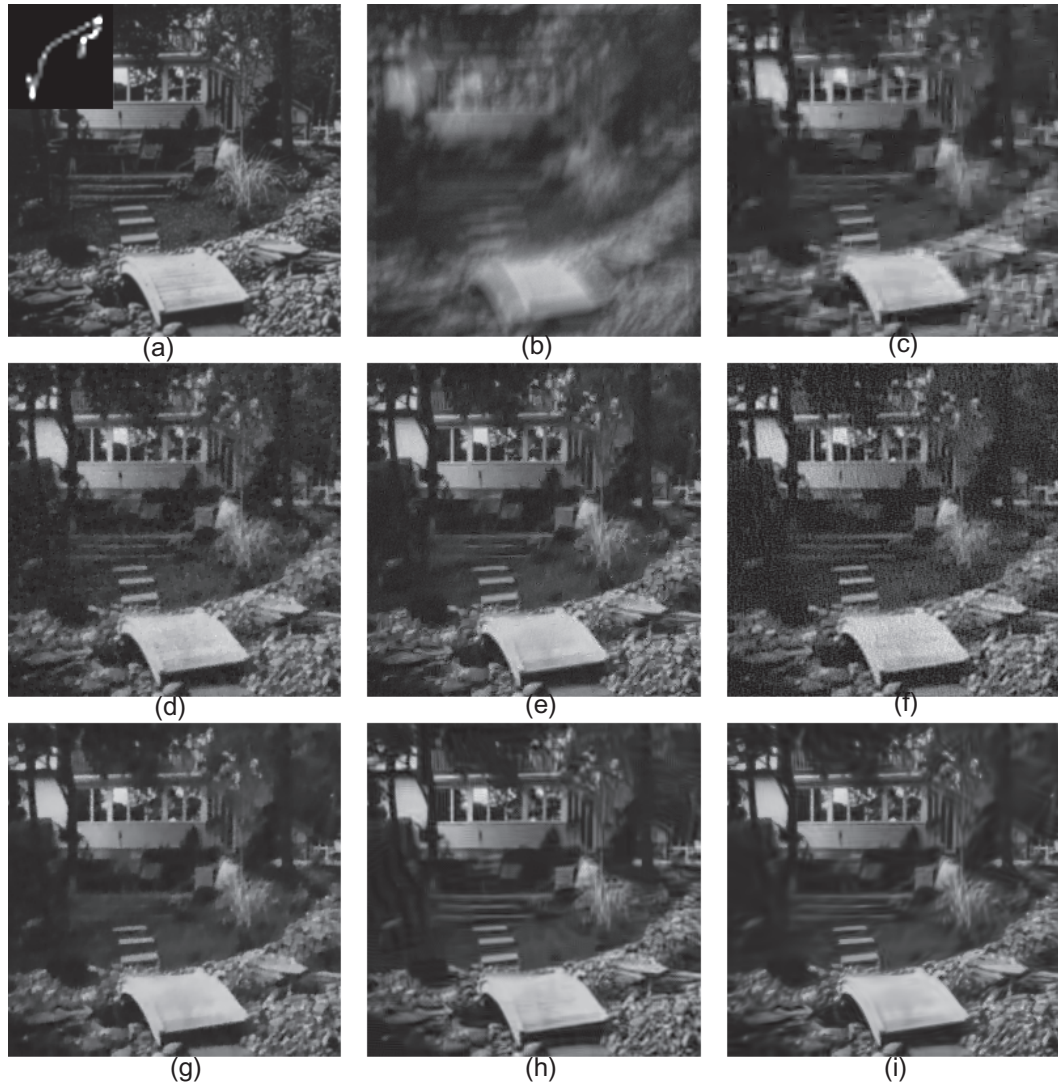

Figure 4:

- (a) clean image and PSF;
- (b) blurred image,  $\text{BSNR} = 25$  ;
- (c) ForWaRD result,  $\text{ISNR} = 9.26$ ;
- (d) FTVd result,  $\text{ISNR} = 12.48$ ;
- (e) L0-ABS result,  $\text{ISNR} = 12.15$ ;
- (f) SURE-LET result,  $\text{ISNR} = 8.23$ ;
- (g) PIEIAS result,  $\text{ISNR} = 13.06$ ;
- (h) BM3DDEB result,  $\text{ISNR} = 13.42$ ;
- (i) Our result,  $\text{ISNR} = 14.23$ .

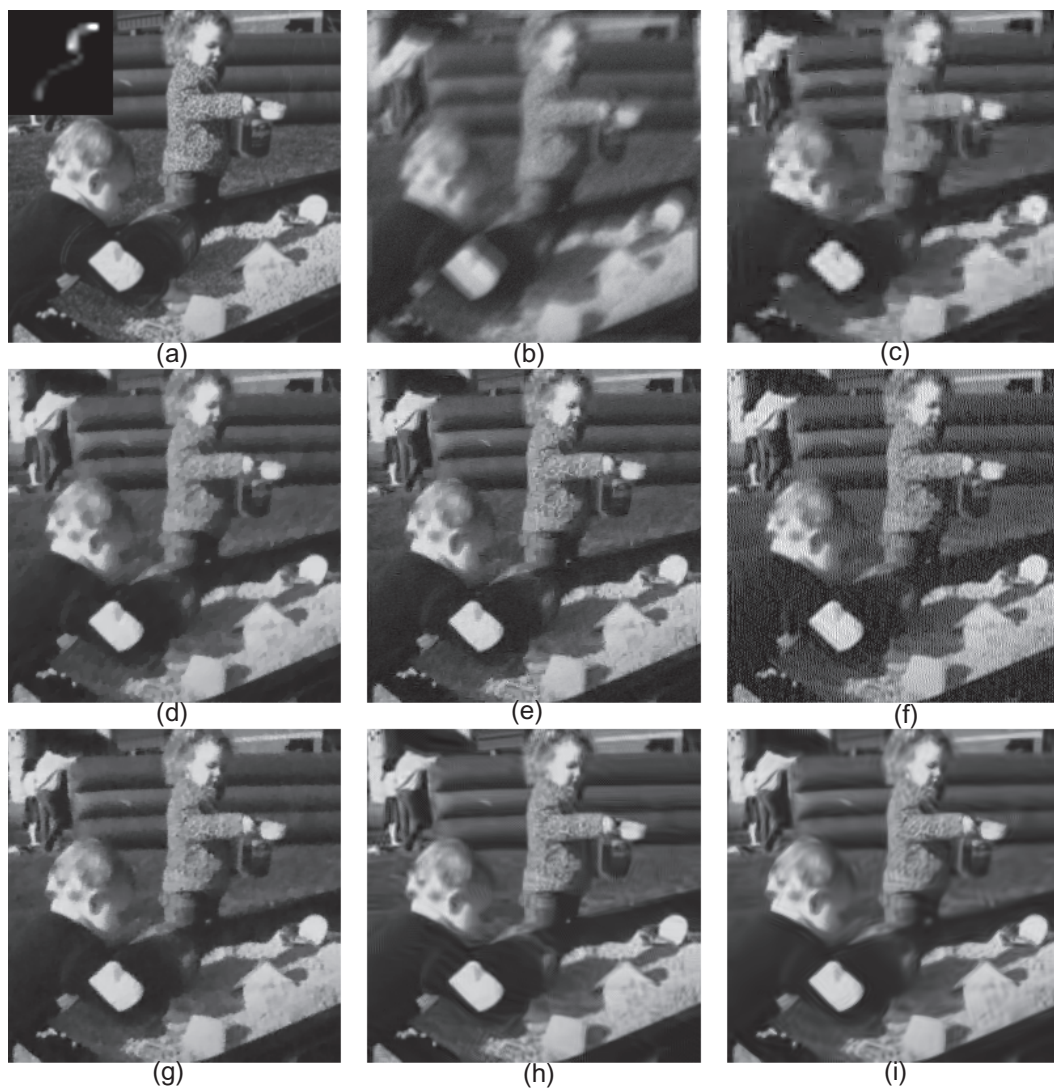

Figure 5:

- (a) clean image and PSF;
- (b) blurred image,  $\text{BSNR} = 25$  ;
- (c) ForWaRD result,  $\text{ISNR} = 10.67$ ;
- (d) FTVd result,  $\text{ISNR} = 15.25$ ;
- (e) L0-ABS result,  $\text{ISNR} = 14.52$ ;
- (f) SURE-LET result,  $\text{ISNR} = 4.53$ ;
- (g) PIEIAS result,  $\text{ISNR} = 16.11$ ;
- (h) BM3DDEB result,  $\text{ISNR} = 15.98$ ;
- (i) Our result,  $\text{ISNR} = 16.37$ .

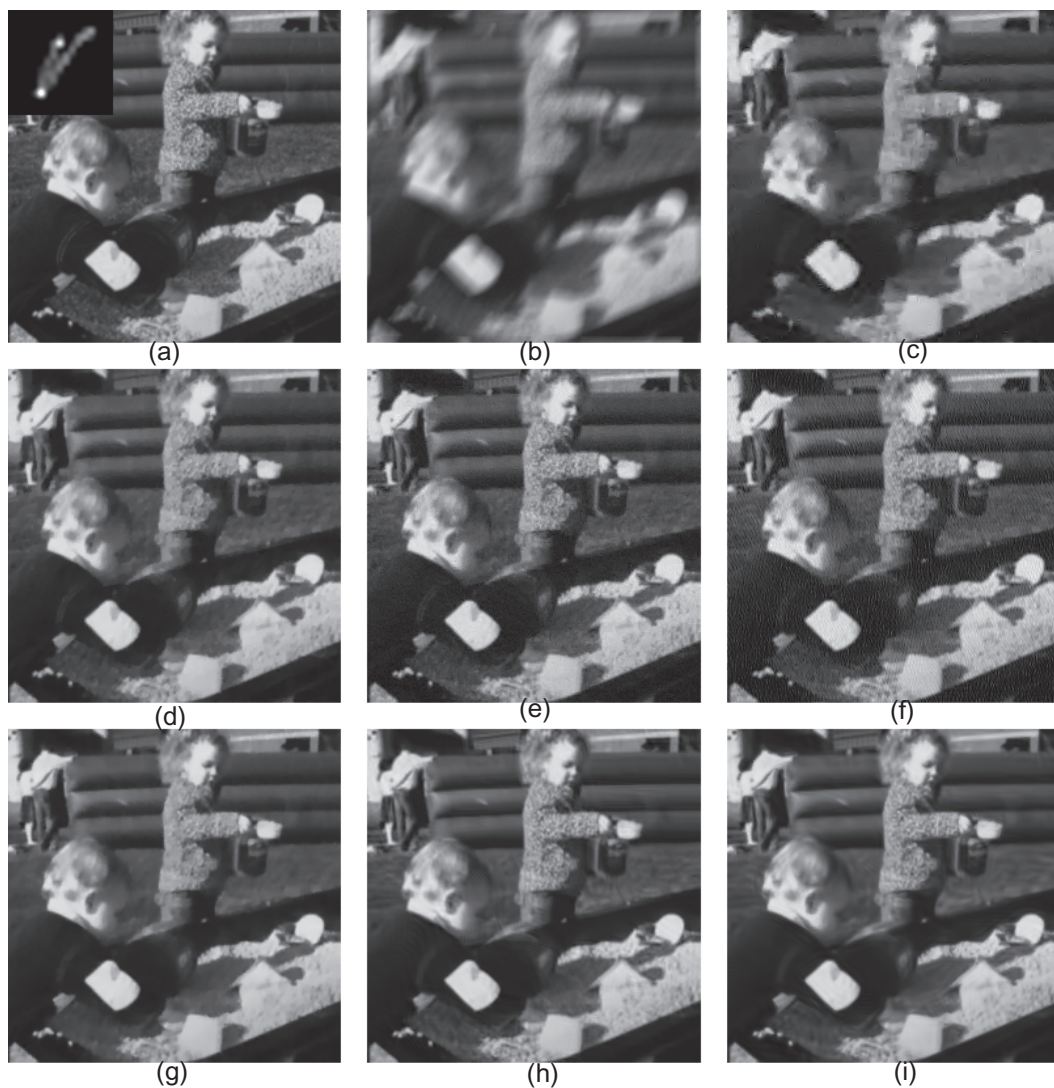

Figure 6:

- (a) clean image and PSF;
- (b) blurred image,  $\text{BSNR} = 35$  ;
- (c) ForWaRD result,  $\text{ISNR} = 8.10$ ;
- (d) FTVd result,  $\text{ISNR} = 13.03$ ;
- (e) L0-ABS result,  $\text{ISNR} = 11.65$ ;
- (f) SURE-LET result,  $\text{ISNR} = 6.11$ ;
- (g) PIEIAS result,  $\text{ISNR} = 13.32$ ;
- (h) BM3DDEB result,  $\text{ISNR} = 13.51$ ;
- (i) Our result,  $\text{ISNR} = 13.96$ .



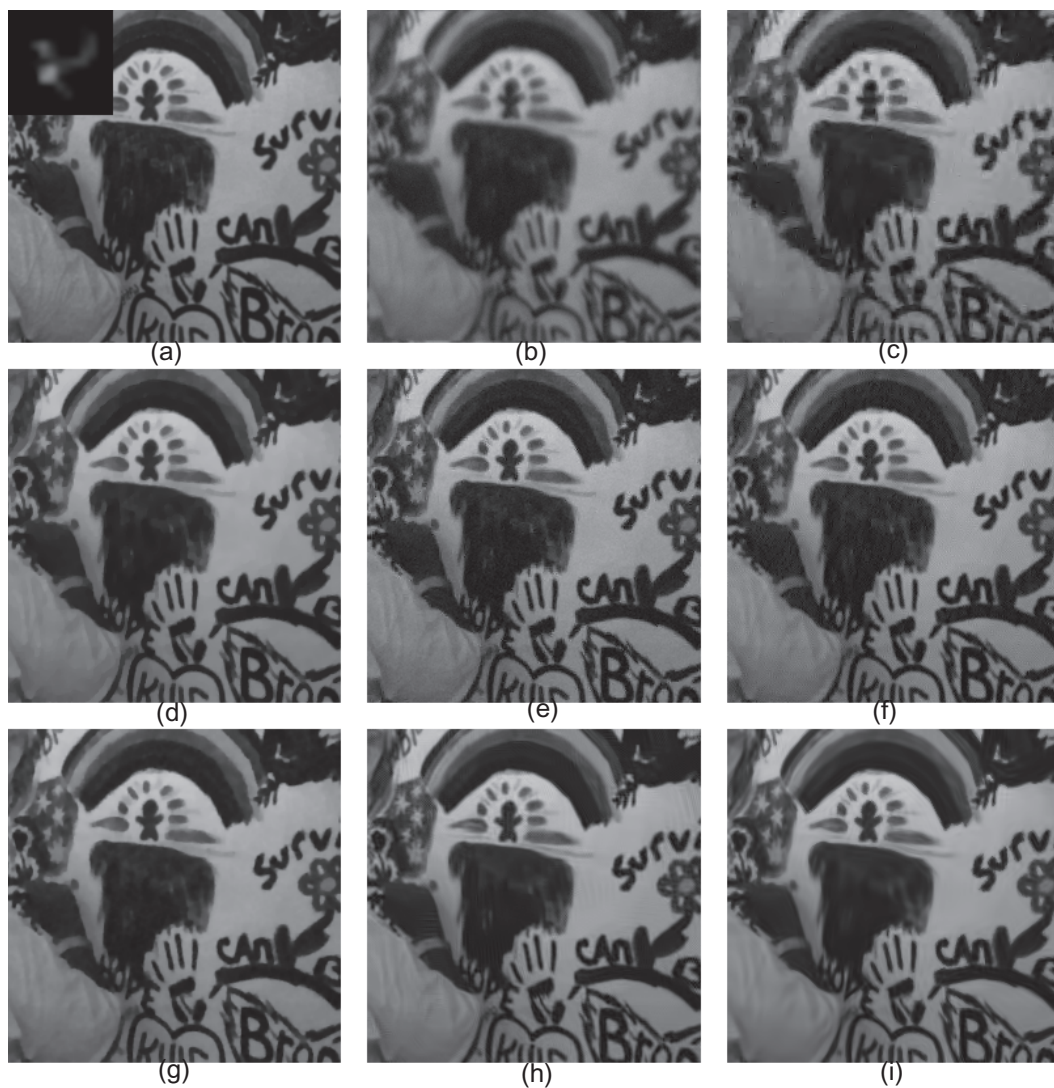

Figure 7:

- (a) clean image and PSF;
- (b) blurred image,  $\text{BSNR} = 30$  ;
- (c) ForWaRD result,  $\text{ISNR} = 9.54$ ;
- (d) FTVd result,  $\text{ISNR} = 12.28$ ;
- (e) L0-ABS result,  $\text{ISNR} = 9.86$ ;
- (f) SURE-LET result,  $\text{ISNR} = 8.20$ ;
- (g) PIEIAS result,  $\text{ISNR} = 12.56$ ;
- (h) BM3DDEB result,  $\text{ISNR} = 12.51$ ;
- (i) Our result,  $\text{ISNR} = 12.77$ .

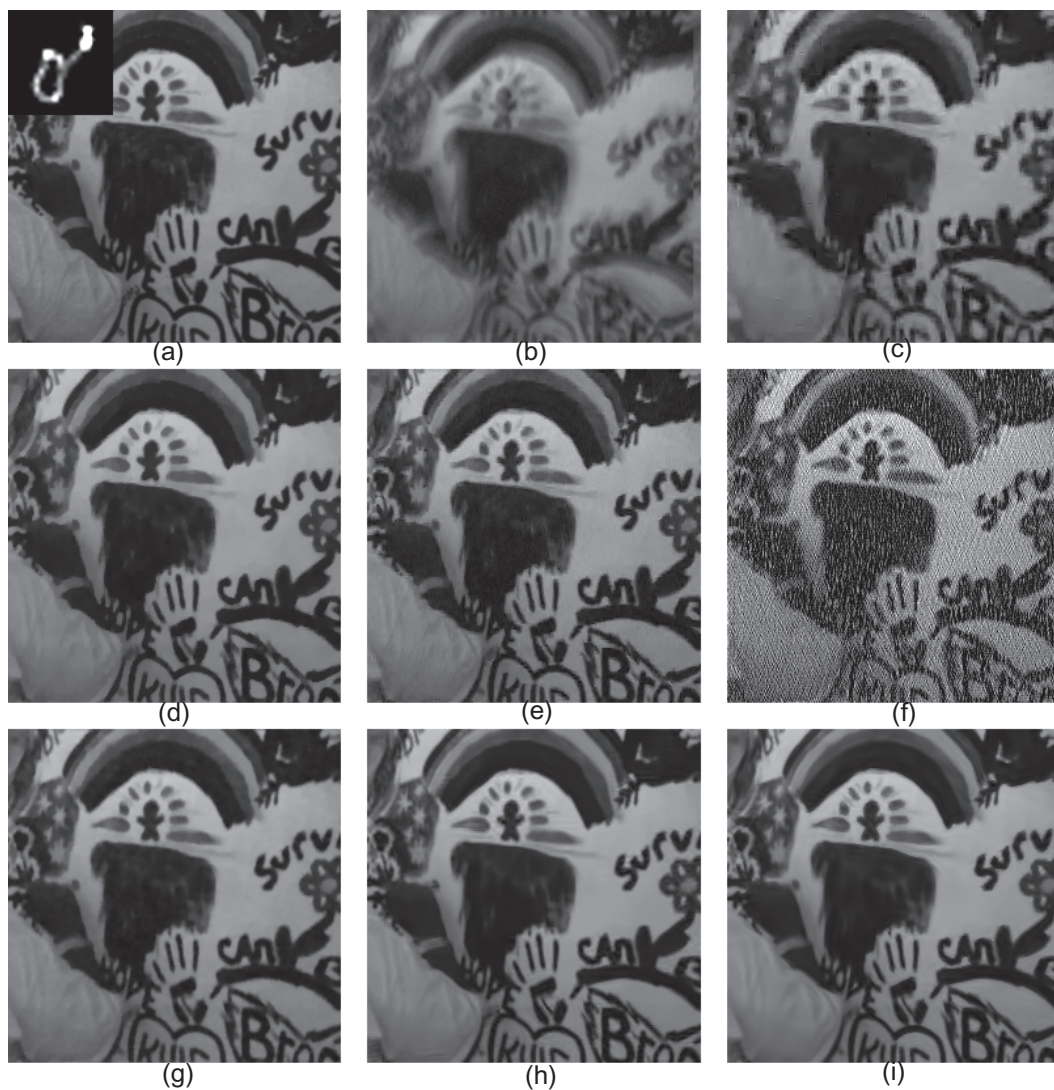

Figure 8:

- (a) clean image and PSF;
- (b) blurred image,  $\text{BSNR} = 25$  ;
- (c) ForWaRD result,  $\text{ISNR} = 9.54$ ;
- (d) FTVd result,  $\text{ISNR} = 15.94$ ;
- (e) L0-ABS result,  $\text{ISNR} = 14.44$ ;
- (f) SURE-LET result,  $\text{ISNR} = -3.80$  ;
- (g) PIEIAS result,  $\text{ISNR} = 16.63$ ;
- (h) BM3DDEB result,  $\text{ISNR} = 16.71$ ;
- (i) Our result,  $\text{ISNR} = 16.89$ .



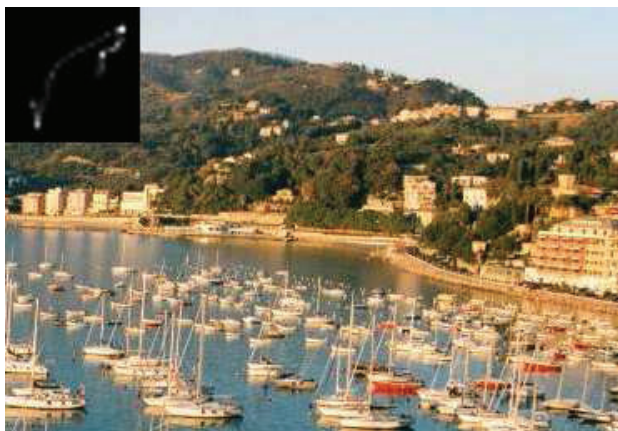

(a) Original image and PSF

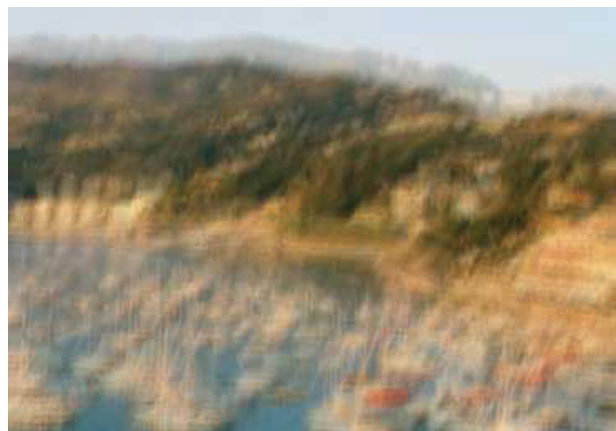

(b) Blurred image, BSNR = 30

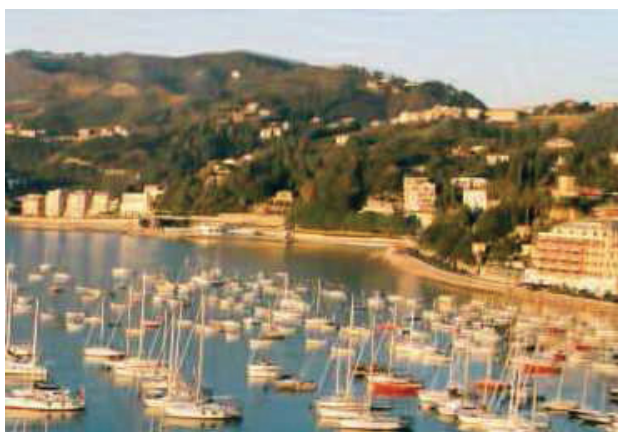

(c) BM3DDEB result, ISNR = 9.62

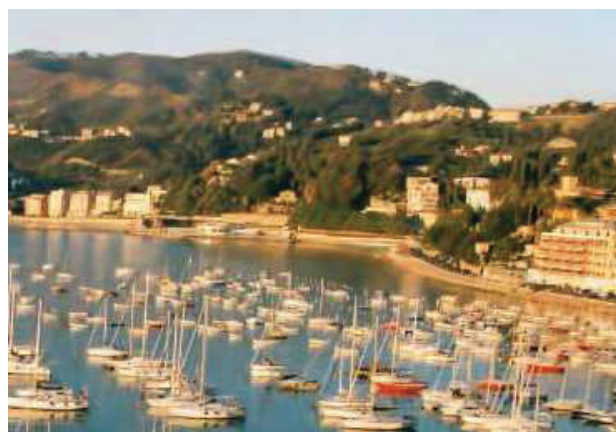

(d) Our result, ISNR = 10.28

Figure 9:

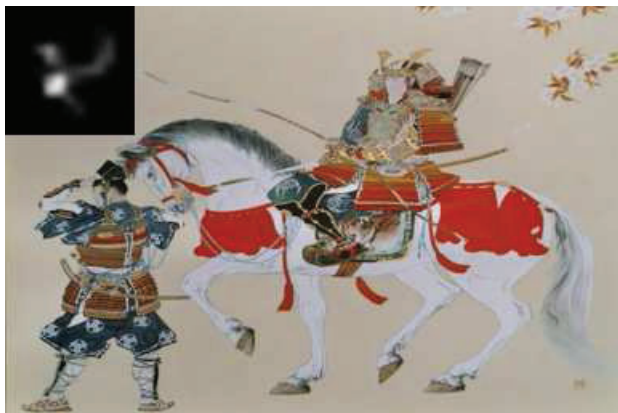

(a) Original image and PSF

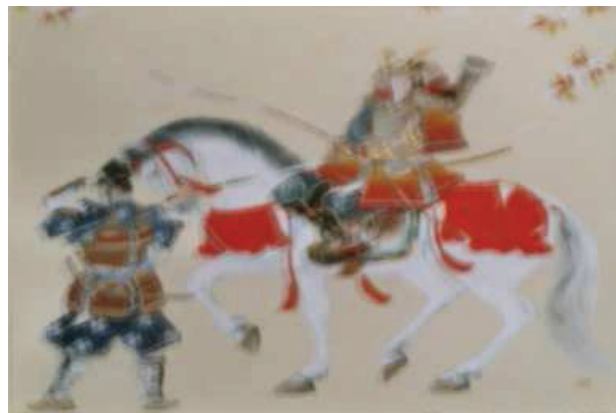

(b) Blurred image, BSNR = 25

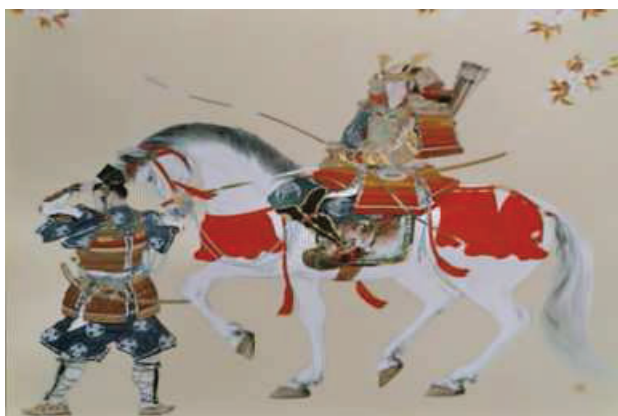

(c) BM3DDEB result, ISNR = 9.09

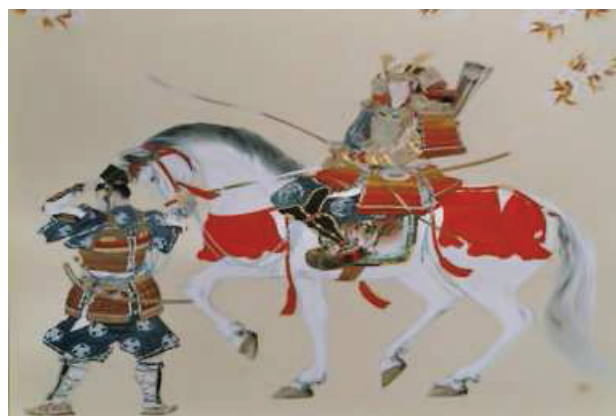

(d) Our result, ISNR = 9.25

Figure 10:

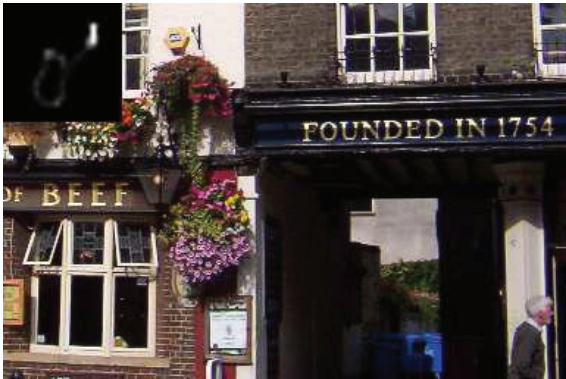

(a) Original image and PSF

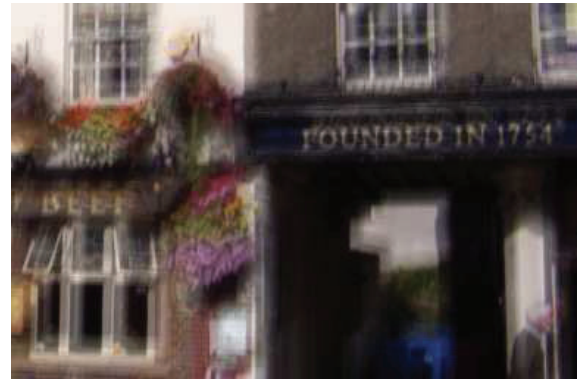

(b) Blurred image, BSNR = 30

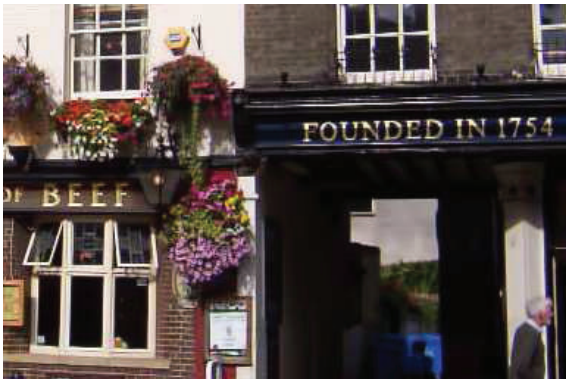

(c) BM3DDEB result, ISNR = 13.36

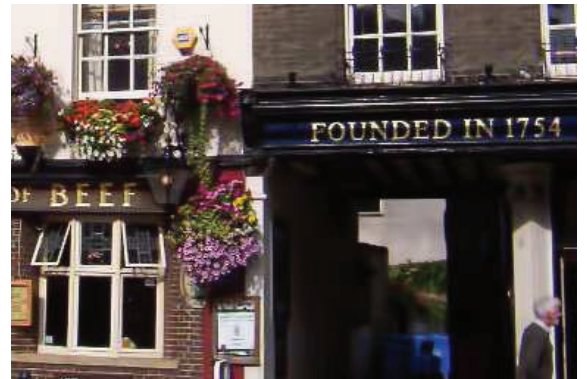

(d) Our result, ISNR = 13.69

Figure 11:



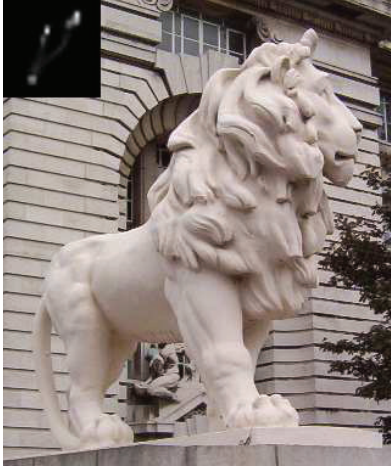

(a) Original image and PSF

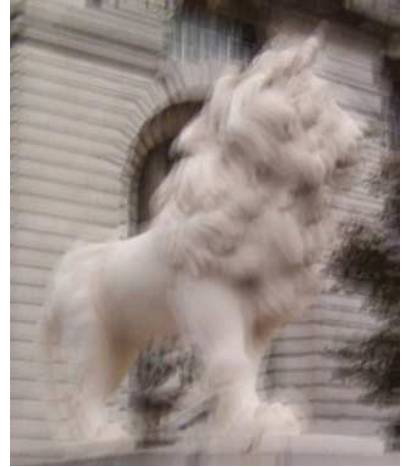

(b) Blurred image, BSNR = 25

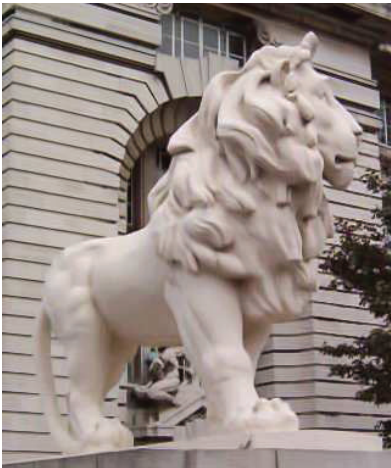

(c) BM3DDEB result, ISNR = 11.84

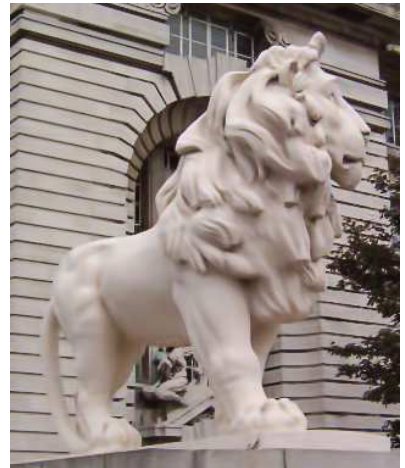

(d) Our result, ISNR = 12.60

Figure 12:

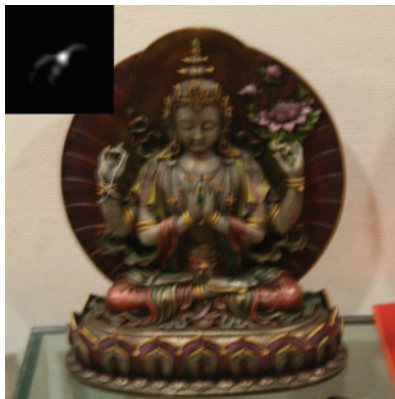

(a)

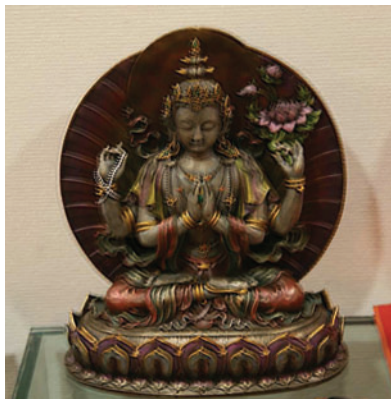

(b)

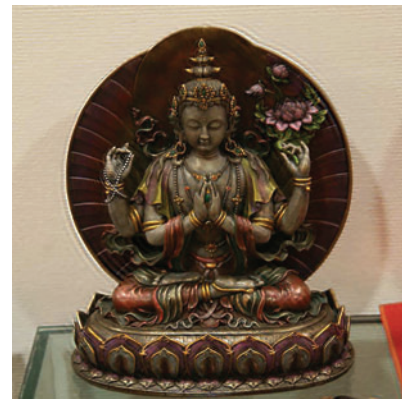

(c)

Figure 13: (a) The input blurred image and the kernel is estimated from the blurred image using [Jia et al. 2010]. (b) The deconvolution result is achieved from [Jia et al. 2010]. (c) our non-blind deconvolution result is computed from the blurred image only. The kernel is estimated by [Jia et al. 2010]

Jia et al. 2010 : Li Xu, J.Jia: Two-phase kernel estimation for robust motion deblurring, ECCV, 2010, 157-170.

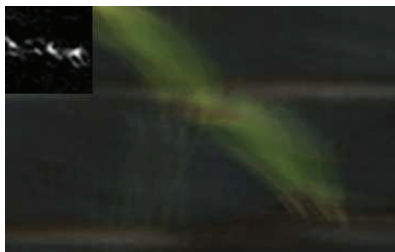

(a)

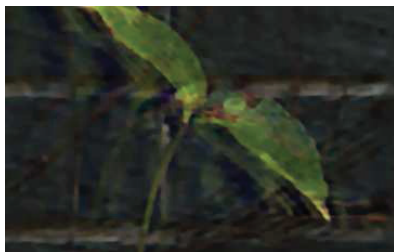

(b)

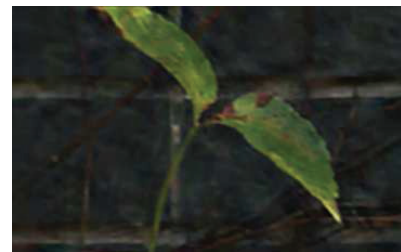

(c)

Figure 14: (a) The input blurred image and the kernel is estimated from the blurred image using [Jia et al. 2010]. (b) The deconvolution result is achieved from [Jia et al. 2010]. (c) our non-blind deconvolution result is computed from the blurred image only. The kernel is estimated by [Jia et al. 2010].

Jia et al. 2010 : Li Xu, J.Jia: Two-phase kernel estimation for robust motion deblurring, ECCV, 2010, 157-170.
